# Supplementary material for: PlantMine: A Machine-Learning Framework to Detect Core SNPs in Rice Genomics
Source: MDPI journal article supplement (doi:10.3390/genes15050603), 2024-05-09
Supplement: s1 [file s1]

Table S1. Performance of different combinations on the test and training datasets in regression tasks

| Data set | Feature selection methods | Machine learning algorithms | Optimal features | Accuracy (%) |
|----------|---------------------------|-----------------------------|------------------|--------------|
| Train    | anova                     | KNN                         | 760              | 0.821003     |
|          |                           | SVM                         | 7150             | 0.717382     |
|          |                           | XGBoost                     | 770              | 0.999854     |
|          |                           | RF                          | 7190             | 0.978797     |
|          | fs                        | KNN                         | 360              | 0.851882     |
|          |                           | SVM                         | 1080             | 0.735577     |
|          |                           | XGBoost                     | 6910             | 0.950806     |
|          |                           | RF                          | 3360             | 0.978604     |
|          | mic                       | KNN                         | 1750             | 0.854016     |
|          |                           | SVM                         | 840              | 0.720951     |
|          |                           | XGBoost                     | 4100             | 0.998962     |
|          |                           | RF                          | 3690             | 0.978831     |
|          | anova                     | KNN                         | 1170             | 0.737001     |
|          |                           | SVM                         | 790              | 0.636433     |
|          |                           | XGBoost                     | 510              | 0.607868     |
|          |                           | RF                          | 880              | 0.730588     |
| Test     | fs                        | KNN                         | 170              | 0.691149     |
|          |                           | SVM                         | 800              | 0.6801       |
|          |                           | XGBoost                     | 790              | 0.698819     |
|          |                           | RF                          | 950              | 0.701213     |
|          | mic                       | KNN                         | 1540             | 0.70826      |
|          |                           | SVM                         | 740              | 0.655904     |
|          |                           | XGBoost                     | 2070             | 0.698285     |
|          |                           | RF                          | 2290             | 0.694212     |

Table S2. Performance of different combinations on the test and training datasets in Classification tasks

| Data set | Feature selection methods | Machine learning algorithms | Optimal features | Accuracy (%) |
|----------|---------------------------|-----------------------------|------------------|--------------|
| Train    | anova                     | KNN                         | 260              | 0.625        |
|          |                           | SVM                         | 390              | 0.675        |
|          |                           | XGBoost                     | 6960             | 0.664149     |
|          |                           | RF                          | 890              | 0.671429     |
|          | fs                        | KNN                         | 1260             | 0.595811     |
|          |                           | SVM                         | 1420             | 0.703571     |
|          |                           | XGBoost                     | 3620             | 0.666374     |
|          |                           | RF                          | 1260             | 0.692857     |
|          | mic                       | KNN                         | 520              | 0.62885      |
|          |                           | SVM                         | 1570             | 0.689286     |
|          |                           | XGBoost                     | 3620             | 0.666374     |
|          |                           | RF                          | 2080             | 0.682143     |
|          | anova                     | KNN                         | 10               | 0.466071     |
|          |                           | SVM                         | 940              | 0.647621     |
|          |                           | XGBoost                     | 510              | 0.607868     |
|          |                           | RF                          | 5210             | 0.642267     |
| Test     | fs                        | KNN                         | 50               | 0.546494     |
|          |                           | SVM                         | 1660             | 0.654765     |
|          |                           | XGBoost                     | 500              | 0.616071     |
|          |                           | RF                          | 1170             | 0.65253      |
|          | mic                       | KNN                         | 110              | 0.342857     |
|          |                           | SVM                         | 430              | 0.652978     |
|          |                           | XGBoost                     | 500              | 0.65         |
|          |                           | RF                          | 1790             | 0.650299     |

Table S3. The intersection of the top 300 SNPs selected by different feature selection methods.

| TASK           | CHROM | POS      | ID        | ANNOTATION                                                     |
|----------------|-------|----------|-----------|----------------------------------------------------------------|
| Regress        | 2     | 29403    | 43300326  | LOC_Os02g01040, LOC_Os02g01050, LOC_Os02g01060, LOC_Os02g01070 |
|                | 3     | 35809832 | 115018005 | LOC_Os03g63360, LOC_Os03g63370                                 |
|                | 3     | 11141920 | 90350093  | LOC_Os03g19800                                                 |
|                | 6     | 11557454 | 192640574 | LOC_Os06g20140, LOC_Os06g20150                                 |
|                | 10    | 680411   | 294165681 | LOC_Os10g02070, LOC_Os10g02080                                 |
|                | 3     | 4441485  | 83649658  | LOC_Os03g08610, LOC_Os03g08620, LOC_Os03g08624, LOC_Os03g08630 |
|                | 12    | 3066511  | 348780174 | LOC_Os12g06380, LOC_Os12g06400, LOC_Os12g06410                 |
|                | 4     | 32212743 | 147834735 | LOC_Os04g54050, LOC_Os04g54060                                 |
|                | 2     | 34844962 | 78115885  | LOC_Os02g56850                                                 |
| Classification | 4     | 4278367  | 119900359 | LOC_Os04g08034                                                 |
|                | 10    | 23000354 | 316485624 | LOC_Os10g42650                                                 |
|                | 3     | 35809832 | 115018005 | LOC_Os03g63360, LOC_Os03g63370                                 |
|                | 9     | 22932040 | 293404590 | LOC_Os09g39980, LOC_Os09g40000                                 |

*ANNOTATION* column in the table: For each SNP, a 5kb region upstream and downstream, totaling 10kb, is analyzed to annotate the genes involved within this range.
