# Supplementary figures and images for: PlantMine: A Machine-Learning Framework to Detect Core SNPs in Rice Genomics
Source: MDPI journal article supplement (doi:10.3390/genes15050603), 2024-05-09

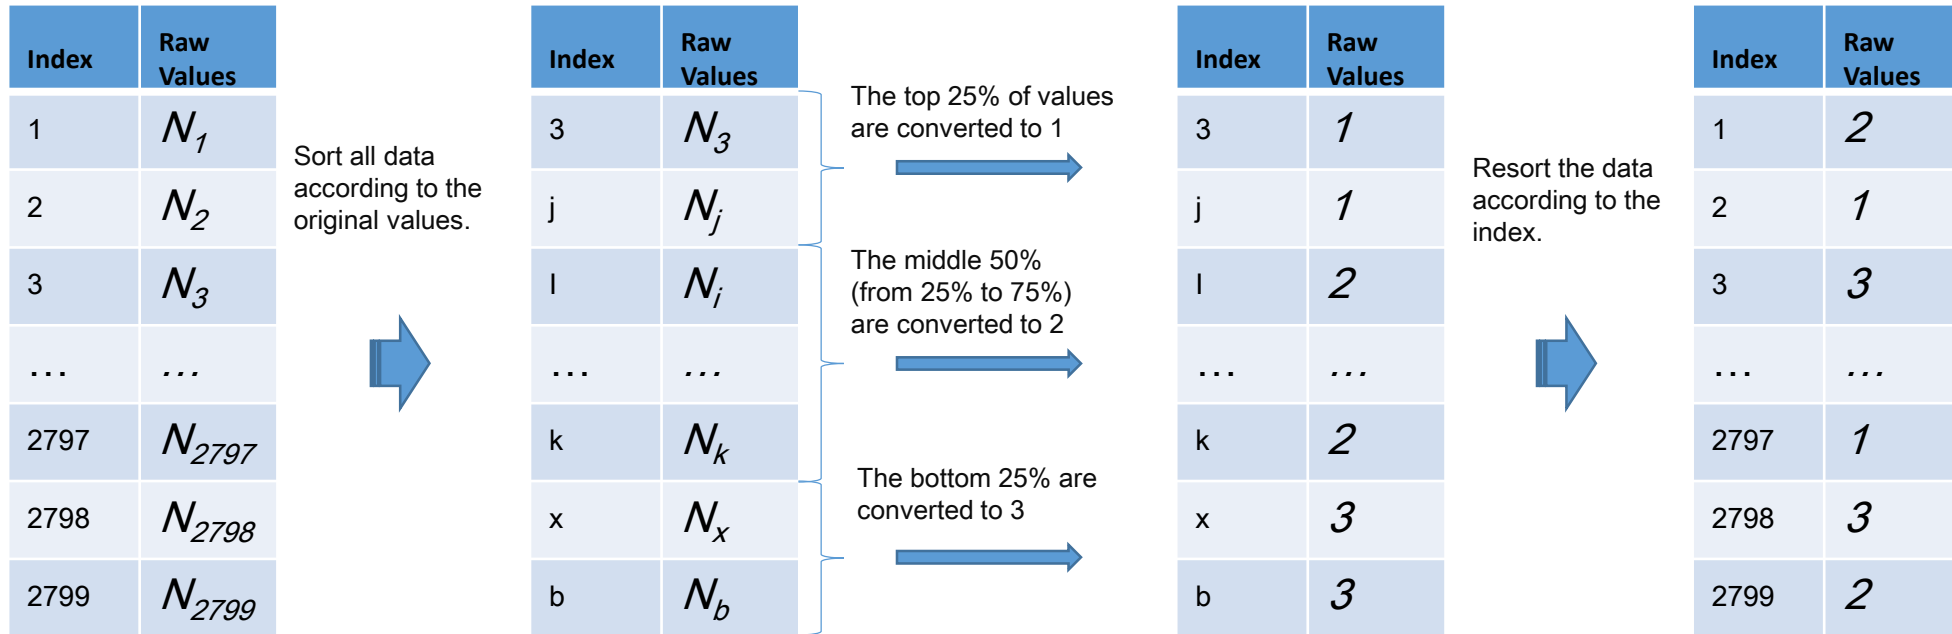

Figure S1. Schematic of the method for generating classification labels.

Supplement: s1 [file s1]
